# Supplementary material for: Microwave-assisted synthesis and deposition of a thin ZnO layer on microwave-exfoliated graphene: optical and electrochemical evaluations
Source: Royal Society of Chemistry journal article supplement (doi:10.1039/c5ra09936f), 2015-01-01
Supplement: c5ra09936f1.pdf [file c5ra09936f1.pdf]

## Supplementary Information

### Microwave-assisted synthesis and deposition of a thin ZnO layer on microwave-exfoliated graphene: Optical and electrochemical evaluations

Rajesh Kumar<sup>\*a</sup>, Rajesh Kumar Singh<sup>\*b</sup>, Alfredo R. Vaz<sup>a</sup>, Stanislav A. Moshkalev<sup>a</sup>

<sup>a</sup> Centre for Semiconductor Components, State University of Campinas, Campinas, Sao Paulo 13083-870, Brazil. E-mail: rajeshbhu1@gmail.com

<sup>b</sup> Department of Physics, Indian Institute of Technology (Banaras Hindu University), Varanasi-221005, India. E-mail: rksbhu@gmail.com

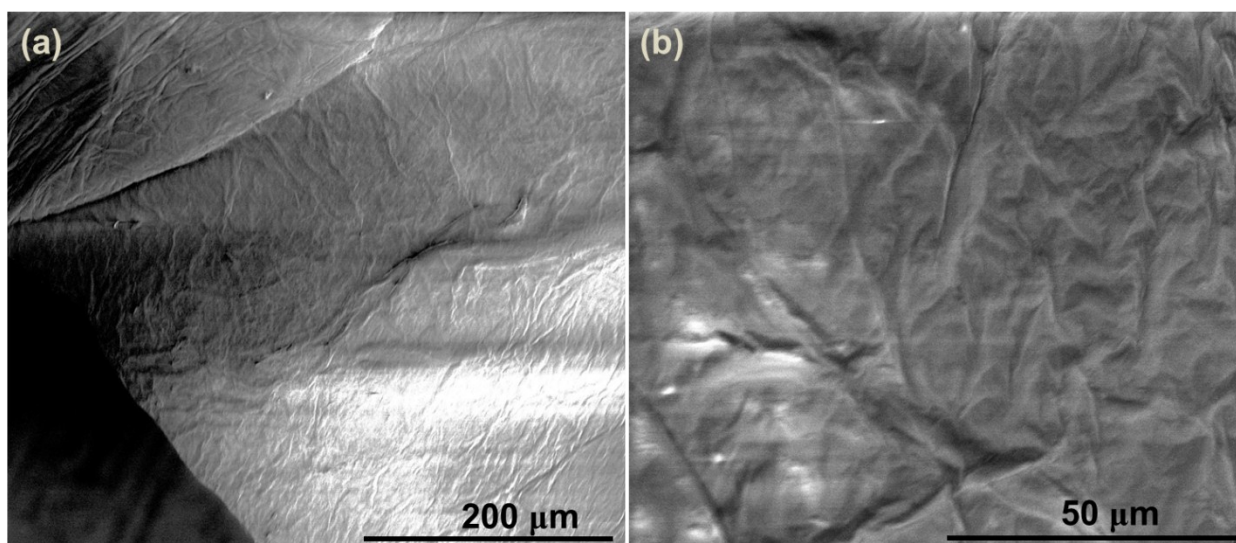

**Figure S1.** SEM image of graphite oxide.
